# Supplementary material
Source: PubMed Central journal article supplement (PMC7489081)
Supplement: gbz067_suppl_supplementary_material.pdf [file gbz067_suppl_supplementary_material.pdf]

**Appendix: Full Regression Results for Summary Material Shown in Tables 4 and 5 of Main Text of “Self-Rated Health by Sexual Orientation Among Middle-Aged and Older Adults in Canada”**

Table A1. Odds Ratios from Weighted Logistic Regression Models Predicting Fair/Poor Physical Health and Mental Health Among Men 45+, (N=27,341)

|                                                | <i>Fair/Poor Physical Health</i> |         |         | <i>Fair/Poor Mental Health</i> |         |         |
|------------------------------------------------|----------------------------------|---------|---------|--------------------------------|---------|---------|
|                                                | 1A                               | 1B      | 1C      | 2A                             | 2B      | 2C      |
| Sexual Orientation ( <i>Heterosexual Men</i> ) |                                  |         |         |                                |         |         |
| Gay Men                                        | 1.32                             | 1.10    | 1.20    | 2.23**                         | 1.84*   | 1.77*   |
| Bisexual Men                                   | 1.00                             | 0.79    | 0.87    | 1.82†                          | 1.40    | 1.43    |
| Don't Know                                     | 1.91**                           | 1.40    | 1.20    | 1.70                           | 1.18    | 1.02    |
| Age ( <i>45-54</i> )                           |                                  |         |         |                                |         |         |
| 55-64                                          | 1.54***                          | 1.44*** | 1.47*** | 1.00                           | 0.92    | 0.93    |
| 65-74                                          | 1.73***                          | 1.34**  | 1.42*** | 0.69**                         | 0.53*** | 0.56*** |
| 75+                                            | 2.33***                          | 1.62*** | 1.58*** | 1.04                           | 0.72*   | 0.70*   |
| Household Income ( <i>\$100,000 or more</i> )  |                                  |         |         |                                |         |         |
| \$19,999 or less                               |                                  | 7.48*** | 5.54*** |                                | 7.54*** | 5.07*** |
| \$20,000 to \$39,999                           |                                  | 3.74*** | 2.99*** |                                | 3.50*** | 2.69*** |
| \$40,000 to \$59,999                           |                                  | 2.19*** | 1.87*** |                                | 1.97*** | 1.63**  |
| \$60,000 to \$79,999                           |                                  | 1.54*** | 1.38**  |                                | 1.62**  | 1.42*   |
| \$80,000 to \$99,999                           |                                  | 1.62*** | 1.52**  |                                | 1.50*   | 1.39†   |
| Education ( <i>Advanced degree</i> )           |                                  |         |         |                                |         |         |
| Less than high school                          |                                  |         | 2.15    |                                |         | 2.18*** |
| High school only                               |                                  |         | 1.37†   |                                |         | 1.69**  |
| Some post-secondary                            |                                  |         | 1.32    |                                |         | 1.66**  |
| Bachelor's degree                              |                                  |         | 0.91    |                                |         | 1.46†   |
| Missing                                        |                                  |         | 1.72*   |                                |         | 1.58    |
| Partnership ( <i>Married/Common-Law</i> )      |                                  |         |         |                                |         |         |
| Divorced/Separated/Widowed                     |                                  |         | 1.17*   |                                |         | 1.69*** |
| Single                                         |                                  |         | 1.32**  |                                |         | 1.61**  |
| Missing                                        |                                  |         | 0.87    |                                |         | 0.85    |
| Race ( <i>White Non-Aboriginal</i> )           |                                  |         |         |                                |         |         |
| Non-White Non-Aboriginal                       |                                  |         | 1.19    |                                |         | 0.78    |
| Aboriginal                                     |                                  |         | 1.65*** |                                |         | 1.67**  |
| Missing                                        |                                  |         | 1.00    |                                |         | 0.90    |
| Province of Residence ( <i>Ontario</i> )       |                                  |         |         |                                |         |         |
| Atlantic – NB, NL, NS, PEI                     |                                  |         | 1.25*   |                                |         | 1.17    |
| Quebec                                         |                                  |         | 0.57*** |                                |         | 0.51*** |
| Prairies – MB, SK, AB                          |                                  |         | 0.98    |                                |         | 0.99    |
| British Columbia                               |                                  |         | 0.97    |                                |         | 1.25†   |
| Territories – YT, NT, NU                       |                                  |         | 0.78    |                                |         | 0.70    |
| Constant                                       | 0.11***                          | 0.06*** | 0.05*** | 0.07***                        | 0.04*** | 0.03*** |

†  $p < 0.1$  \*  $p < 0.05$ . \*\*  $p < 0.01$ . \*\*\*  $p < 0.001$ .

Source: Canadian Community Health Survey 2015-2016

Notes: Controls in nested models are as follows:

A: age. B: age, household income. C: age, household income, education, partnership, race, and province of residence.

Table A2. Odds Ratios from Weighted Logistic Regression Models Predicting Fair/Poor Physical Health and Mental Health Among Men 45-64, (N=15,773)

|                                              | <i>Fair/Poor Physical Health</i> |         |         | <i>Fair/Poor Mental Health</i> |         |         |
|----------------------------------------------|----------------------------------|---------|---------|--------------------------------|---------|---------|
|                                              | 1A                               | 1B      | 1C      | 2A                             | 2B      | 2C      |
| <i>Sexual Orientation (Heterosexual Men)</i> |                                  |         |         |                                |         |         |
| Gay Men                                      | 1.39                             | 1.04    | 1.13    | 2.59**                         | 2.01*   | 2.08*   |
| Bisexual Men                                 | 1.24                             | 0.81    | 0.94    | 2.03†                          | 1.34    | 1.50    |
| Don't Know                                   | 1.50                             | 0.91    | 0.73    | 1.74                           | 1.05    | 0.91    |
| <i>Age (45-49)</i>                           |                                  |         |         |                                |         |         |
| 50-54                                        | 1.26†                            | 1.32*   | 1.29†   | 1.11                           | 1.15    | 1.06    |
| 55-59                                        | 1.75***                          | 1.74*** | 1.72*** | 1.15                           | 1.10    | 1.01    |
| 60-64                                        | 1.73***                          | 1.60**  | 1.62*** | 0.95                           | 0.85    | 0.78    |
| <i>Household Income (\$100,000 or more)</i>  |                                  |         |         |                                |         |         |
| \$19,999 or less                             |                                  | 9.83*** | 7.27*** |                                | 9.48*** | 7.00*** |
| \$20,000 to \$39,999                         |                                  | 4.62    | 3.69*** |                                | 3.95*** | 3.21*** |
| \$40,000 to \$59,999                         |                                  | 2.23    | 1.86*** |                                | 2.19*** | 1.84**  |
| \$60,000 to \$79,999                         |                                  | 1.56    | 1.38†   |                                | 1.59*   | 1.41†   |
| \$80,000 to \$99,999                         |                                  | 1.81    | 1.68*   |                                | 1.45†   | 1.33    |
| <i>Education (Advanced degree)</i>           |                                  |         |         |                                |         |         |
| Less than high school                        |                                  |         | 2.38**  |                                |         | 3.17*** |
| High school only                             |                                  |         | 1.37    |                                |         | 2.46*** |
| Some post-secondary                          |                                  |         | 1.25    |                                |         | 2.23*** |
| Bachelor's degree                            |                                  |         | 0.96    |                                |         | 2.31**  |
| Missing                                      |                                  |         | 1.45    |                                |         | 2.80*   |
| <i>Partnership (Married/Common-Law)</i>      |                                  |         |         |                                |         |         |
| Divorced/Separated/Widowed                   |                                  |         | 1.21    |                                |         | 1.77*** |
| Single                                       |                                  |         | 1.31*   |                                |         | 1.33†   |
| Missing                                      |                                  |         | 2.94    |                                |         | 1.17    |
| <i>Race (White Non-Aboriginal)</i>           |                                  |         |         |                                |         |         |
| Non-White Non-Aboriginal                     |                                  |         | 1.07    |                                |         | 0.57*   |
| Aboriginal                                   |                                  |         | 1.63**  |                                |         | 1.50†   |
| Missing                                      |                                  |         | 2.94    |                                |         | 0.96    |
| <i>Province of Residence (Ontario)</i>       |                                  |         |         |                                |         |         |
| Atlantic – NB, NL, NS, PEI                   |                                  |         | 1.20    |                                |         | 1.29    |
| Quebec                                       |                                  |         | 0.51*** |                                |         | 0.55*** |
| Prairies – MB, SK, AB                        |                                  |         | 0.91    |                                |         | 1.06    |
| British Columbia                             |                                  |         | 0.89    |                                |         | 1.47*   |
| Territories – YT, NT, NU                     |                                  |         | 0.65†   |                                |         | 0.64    |
| Constant                                     | 0.09***                          | 0.05*** | 0.04*** |                                | 0.03*** | 0.02*** |

†  $p < 0.1$  \*  $p < 0.05$ . \*\*  $p < 0.01$ . \*\*\*  $p < 0.001$ .

Source: Canadian Community Health Survey 2015-2016

Notes: Controls in nested models are as follows:

A: age. B: age, household income. C: age, household income, education, partnership, race, and province of residence.

Table A3. Odds Ratios from Weighted Logistic Regression Models Predicting Fair/Poor Physical Health and Mental Health Among Men 65+, (N=11,568)

|                                              | <i>Fair/Poor Physical Health</i> |         |         | <i>Fair/Poor Mental Health</i> |         |         |
|----------------------------------------------|----------------------------------|---------|---------|--------------------------------|---------|---------|
|                                              | 1A                               | 1B      | 1C      | 2A                             | 2B      | 2C      |
| <i>Sexual Orientation (Heterosexual Men)</i> |                                  |         |         |                                |         |         |
| Gay Men                                      | 1.15                             | 1.13    | 1.34    | 0.89                           | 0.88    | 0.72    |
| Bisexual Men                                 | 0.74                             | 0.70    | 0.77    | 1.41                           | 1.44    | 1.25    |
| Don't Know                                   | 2.33**                           | 2.02*   | 1.81†   | 1.60                           | 1.40    | 1.11    |
| <i>Age (65-69)</i>                           |                                  |         |         |                                |         |         |
| 70-74                                        | 1.09                             | 1.03    | 1.03    | 0.96                           | 0.92    | 0.93    |
| 75+                                          | 1.40***                          | 1.25*   | 1.17†   | 1.46*                          | 1.34†   | 1.31†   |
| <i>Household Income (\$100,000 or more)</i>  |                                  |         |         |                                |         |         |
| \$19,999 or less                             |                                  | 4.19*** | 3.07*** |                                | 3.38*** | 1.94*   |
| \$20,000 to \$39,999                         |                                  | 2.57*** | 2.08*** |                                | 2.28**  | 1.77*   |
| \$40,000 to \$59,999                         |                                  | 1.80*** | 1.59**  |                                | 1.29    | 1.11    |
| \$60,000 to \$79,999                         |                                  | 1.33†   | 1.25    |                                | 1.42    | 1.32    |
| \$80,000 to \$99,999                         |                                  | 1.17    | 1.12    |                                | 1.43    | 1.30    |
| <i>Education (Advanced degree)</i>           |                                  |         |         |                                |         |         |
| Less than high school                        |                                  |         | 2.09*** |                                |         | 1.43    |
| High school only                             |                                  |         | 1.41†   |                                |         | 1.04    |
| Some post-secondary                          |                                  |         | 1.52*   |                                |         | 1.26    |
| Bachelor's degree                            |                                  |         | 0.85    |                                |         | 0.64    |
| Missing                                      |                                  |         | 2.28**  |                                |         | 0.71    |
| <i>Partnership (Married/Common-Law)</i>      |                                  |         |         |                                |         |         |
| Divorced/Separated/Widowed                   |                                  |         | 1.17†   |                                |         | 1.65**  |
| Single                                       |                                  |         | 1.16    |                                |         | 2.70**  |
| Missing                                      |                                  |         | 0.04*** |                                |         | 0.15    |
| <i>Race (White Non-Aboriginal)</i>           |                                  |         |         |                                |         |         |
| Non-White Non-Aboriginal                     |                                  |         | 1.55**  |                                |         | 1.60†   |
| Aboriginal                                   |                                  |         | 1.76**  |                                |         | 2.25*   |
| Missing                                      |                                  |         | 0.38†   |                                |         | 0.65    |
| <i>Province of Residence (Ontario)</i>       |                                  |         |         |                                |         |         |
| Atlantic – NB, NL, NS, PEI                   |                                  |         | 1.42**  |                                |         | 0.99    |
| Quebec                                       |                                  |         | 0.70**  |                                |         | 0.47*** |
| Prairies – MB, SK, AB                        |                                  |         | 1.13    |                                |         | 0.90    |
| British Columbia                             |                                  |         | 1.11    |                                |         | 0.89    |
| Territories – YT, NT, NU                     |                                  |         | 1.14    |                                |         | 1.01    |
| Constant                                     | 0.18***                          | 0.11*** | 0.08*** | 0.05***                        | 0.03*** | 0.03*** |

†  $p < 0.1$  \*  $p < 0.05$ . \*\*  $p < 0.01$ . \*\*\*  $p < 0.001$ .

Source: Canadian Community Health Survey 2015-2016

Notes: Controls in nested models are as follows:

A: age. B: age, household income. C: age, household income, education, partnership, race, and province of residence.

Table A4. Odds Ratios from Weighted Logistic Regression Models Predicting Fair/Poor Physical Health and Mental Health Among Women 45+, (N=32,978)

|                                                | <i>Fair/Poor Physical Health</i> |         |         | <i>Fair/Poor Mental Health</i> |         |         |
|------------------------------------------------|----------------------------------|---------|---------|--------------------------------|---------|---------|
|                                                | 1A                               | 1B      | 1C      | 2A                             | 2B      | 2C      |
| <i>Sexual Orientation (Heterosexual Women)</i> |                                  |         |         |                                |         |         |
| Lesbian Women                                  | 0.82                             | 0.84    | 0.90    | 0.95                           | 0.95    | 1.06    |
| Bisexual Women                                 | 3.10**                           | 2.07*   | 1.98*   | 2.58**                         | 1.71    | 1.54    |
| Don't Know                                     | 1.94**                           | 1.68†   | 1.49    | 2.68*                          | 2.33*   | 1.83†   |
| <i>Age (45-54)</i>                             |                                  |         |         |                                |         |         |
| 55-64                                          | 1.48***                          | 1.31*** | 1.32*** | 0.94                           | 0.82†   | 0.81*   |
| 65-74                                          | 1.64***                          | 1.16†   | 1.15†   | 0.70**                         | 0.50*** | 0.46*** |
| 75+                                            | 2.36***                          | 1.41*** | 1.31**  | 0.61***                        | 0.38*** | 0.29*** |
| <i>Household Income (\$100,000 or more)</i>    |                                  |         |         |                                |         |         |
| \$19,999 or less                               |                                  | 7.26*** | 5.50*** |                                | 6.54*** | 4.21*** |
| \$20,000 to \$39,999                           |                                  | 3.49*** | 2.84*** |                                | 3.28*** | 2.45*** |
| \$40,000 to \$59,999                           |                                  | 2.28*** | 2.02*** |                                | 2.56*** | 2.18*** |
| \$60,000 to \$79,999                           |                                  | 1.74*** | 1.58*** |                                | 2.21*** | 1.90*** |
| \$80,000 to \$99,999                           |                                  | 1.61*** | 1.51**  |                                | 1.95*** | 1.83*** |
| <i>Education (Advanced degree)</i>             |                                  |         |         |                                |         |         |
| Less than high school                          |                                  |         | 2.68*** |                                |         | 2.67*** |
| High school only                               |                                  |         | 1.53**  |                                |         | 1.46*   |
| Some post-secondary                            |                                  |         | 1.54**  |                                |         | 1.38†   |
| Bachelor's degree                              |                                  |         | 0.96    |                                |         | 1.22    |
| Missing                                        |                                  |         | 1.63*   |                                |         | 1.56    |
| <i>Partnership (Married/Common-Law)</i>        |                                  |         |         |                                |         |         |
| Divorced/Separated/Widowed                     |                                  |         | 1.04    |                                |         | 1.66*** |
| Single                                         |                                  |         | 1.15    |                                |         | 1.30*   |
| Missing                                        |                                  |         | 0.57    |                                |         | 0.18*   |
| <i>Race (White Non-Aboriginal)</i>             |                                  |         |         |                                |         |         |
| Non-White Non-Aboriginal                       |                                  |         | 1.41**  |                                |         | 1.18    |
| Aboriginal                                     |                                  |         | 1.60*** |                                |         | 1.53**  |
| Missing                                        |                                  |         | 0.79    |                                |         | 3.25†   |
| <i>Province of Residence (Ontario)</i>         |                                  |         |         |                                |         |         |
| Atlantic – NB, NL, NS, PEI                     |                                  |         | 1.01    |                                |         | 0.86    |
| Quebec                                         |                                  |         | 0.71*** |                                |         | 0.49*** |
| Prairies – MB, SK, AB                          |                                  |         | 1.09    |                                |         | 1.10    |
| British Columbia                               |                                  |         | 0.99    |                                |         | 1.00    |
| Territories – YT, NT, NU                       |                                  |         | 1.28    |                                |         | 0.94    |
| Constant                                       | 0.12***                          | 0.06*** | 0.05*** | 0.08***                        | 0.04*** | 0.03*** |

†  $p < 0.1$  \*  $p < 0.05$ . \*\*  $p < 0.01$ . \*\*\*  $p < 0.001$ .

Source: Canadian Community Health Survey 2015-2016

Notes: Controls in nested models are as follows:

A: age. B: age, household income. C: age, household income, education, partnership, race, and province of residence.

Table A5. Odds Ratios from Weighted Logistic Regression Models Predicting Fair/Poor Physical Health and Mental Health Among Women 45-64, (N=17,636)

|                                                | <i>Fair/Poor Physical Health</i> |         |         | <i>Fair/Poor Mental Health</i> |         |         |
|------------------------------------------------|----------------------------------|---------|---------|--------------------------------|---------|---------|
|                                                | 1A                               | 1B      | 1C      | 2A                             | 2B      | 2C      |
| <i>Sexual Orientation (Heterosexual Women)</i> |                                  |         |         |                                |         |         |
| Lesbian Women                                  | 0.91                             | 0.92    | 0.99    | 1.06                           | 1.05    | 1.17    |
| Bisexual Women                                 | 3.73**                           | 2.19*   | 2.05*   | 2.68**                         | 1.67    | 1.50    |
| Don't Know                                     | 1.99                             | 1.74    | 1.64    | 3.73*                          | 3.37†   | 2.83†   |
| <i>Age (45-49)</i>                             |                                  |         |         |                                |         |         |
| 50-54                                          | 1.14                             | 1.16    | 1.18    | 1.04                           | 1.05    | 1.02    |
| 55-59                                          | 1.59***                          | 1.44*** | 1.44**  | 1.06                           | 0.95    | 0.90    |
| 60-64                                          | 1.59***                          | 1.33*   | 1.33*   | 0.86                           | 0.70*   | 0.67**  |
| <i>Household Income (\$100,000 or more)</i>    |                                  |         |         |                                |         |         |
| \$19,999 or less                               |                                  | 11.4*** | 9.21*** |                                | 7.58*** | 4.99*** |
| \$20,000 to \$39,999                           |                                  | 4.52*** | 3.86*** |                                | 3.90*** | 2.95*** |
| \$40,000 to \$59,999                           |                                  | 2.48*** | 2.27*** |                                | 2.48*** | 2.09*** |
| \$60,000 to \$79,999                           |                                  | 1.90*** | 1.75*** |                                | 2.30*** | 1.97*** |
| \$80,000 to \$99,999                           |                                  | 1.71*** | 1.62**  |                                | 1.87**  | 1.77**  |
| <i>Education (Advanced degree)</i>             |                                  |         |         |                                |         |         |
| Less than high school                          |                                  |         | 2.36*** |                                |         | 2.34**  |
| High school only                               |                                  |         | 1.42†   |                                |         | 1.42    |
| Some post-secondary                            |                                  |         | 1.34    |                                |         | 1.29    |
| Bachelor's degree                              |                                  |         | 0.90    |                                |         | 1.27    |
| Missing                                        |                                  |         | 1.25    |                                |         | 1.61    |
| <i>Partnership (Married/Common-Law)</i>        |                                  |         |         |                                |         |         |
| Divorced/Separated/Widowed                     |                                  |         | 1.04    |                                |         | 1.87*** |
| Single                                         |                                  |         | 1.08    |                                |         | 1.35*   |
| Missing                                        |                                  |         | 0.17*   |                                |         | 0.29    |
| <i>Race (White Non-Aboriginal)</i>             |                                  |         |         |                                |         |         |
| Non-White Non-Aboriginal                       |                                  |         | 1.17    |                                |         | 0.92    |
| Aboriginal                                     |                                  |         | 1.59**  |                                |         | 1.40†   |
| Missing                                        |                                  |         | 0.61    |                                |         | 2.26    |
| <i>Province of Residence (Ontario)</i>         |                                  |         |         |                                |         |         |
| Atlantic – NB, NL, NS, PEI                     |                                  |         | 0.96    |                                |         | 0.94    |
| Quebec                                         |                                  |         | 0.69**  |                                |         | 0.50*** |
| Prairies – MB, SK, AB                          |                                  |         | 1.19    |                                |         | 1.15    |
| British Columbia                               |                                  |         | 0.94    |                                |         | 0.92    |
| Territories – YT, NT, NU                       |                                  |         | 1.31    |                                |         | 0.83    |
| Constant                                       | 0.11***                          | 0.05*** | 0.04*** | 0.08***                        | 0.04*** | 0.03*** |

†  $p < 0.1$  \*  $p < 0.05$ . \*\*  $p < 0.01$ . \*\*\*  $p < 0.001$ .

Source: Canadian Community Health Survey 2015-2016

Notes: Controls in nested models are as follows:

A: age. B: age, household income. C: age, household income, education, partnership, race, and province of residence.

Table A6. Odds Ratios from Weighted Logistic Regression Models Predicting Fair/Poor Physical Health and Mental Health Among Women 65+, (N=15,342)

|                                                | <i>Fair/Poor Physical Health</i> |         |         | <i>Fair/Poor Mental Health</i> |         |                 |
|------------------------------------------------|----------------------------------|---------|---------|--------------------------------|---------|-----------------|
|                                                | 1A                               | 1B      | 1C      | 2A                             | 2B      | 2C <sup>a</sup> |
| <i>Sexual Orientation (Heterosexual Women)</i> |                                  |         |         |                                |         |                 |
| Lesbian Women                                  | 0.56                             | 0.56    | 0.65    | 0.31                           | 0.31    | 0.35            |
| Bisexual Women                                 | 1.40                             | 1.22    | 1.24    | 2.21                           | 1.91    | 2.09            |
| Don't Know                                     | 1.89**                           | 1.69*   | 1.45    | 1.65†                          | 1.48    | 1.16            |
| <i>Age (65-69)</i>                             |                                  |         |         |                                |         |                 |
| 70-74                                          | 1.17†                            | 1.10    | 1.05    | 0.92                           | 0.87    | 0.80            |
| 75+                                            | 1.54***                          | 1.34*** | 1.23**  | 0.86                           | 0.77    | 0.65**          |
| <i>Household Income (\$100,000 or more)</i>    |                                  |         |         |                                |         |                 |
| \$19,999 or less                               |                                  | 3.26*** | 2.35*** |                                | 4.06*** | 2.75***         |
| \$20,000 to \$39,999                           |                                  | 1.97*** | 1.57**  |                                | 2.02**  | 1.62†           |
| \$40,000 to \$59,999                           |                                  | 1.50**  | 1.32†   |                                | 2.13**  | 1.93**          |
| \$60,000 to \$79,999                           |                                  | 1.20    | 1.16    |                                | 1.66†   | 1.67†           |
| \$80,000 to \$99,999                           |                                  | 1.20    | 1.13    |                                | 1.90†   | 1.85†           |
| <i>Education (Advanced degree)</i>             |                                  |         |         |                                |         |                 |
| Less than high school                          |                                  |         | 3.50*** |                                |         | 3.70***         |
| High school only                               |                                  |         | 1.71*   |                                |         | 1.48            |
| Some post-secondary                            |                                  |         | 2.03**  |                                |         | 1.66†           |
| Bachelor's degree                              |                                  |         | 1.11    |                                |         | 1.04            |
| Missing                                        |                                  |         | 2.38**  |                                |         | 1.77            |
| <i>Partnership (Married/Common-Law)</i>        |                                  |         |         |                                |         |                 |
| Divorced/Separated/Widowed                     |                                  |         | 1.05    |                                |         | 1.30†           |
| Single                                         |                                  |         | 1.06    |                                |         | 0.91            |
| Missing                                        |                                  |         | 1.08    |                                |         | -               |
| <i>Race (White Non-Aboriginal)</i>             |                                  |         |         |                                |         |                 |
| Non-White Non-Aboriginal                       |                                  |         | 1.94*** |                                |         | 2.21***         |
| Aboriginal                                     |                                  |         | 1.41†   |                                |         | 1.81*           |
| Missing                                        |                                  |         | 1.30    |                                |         | 5.82*           |
| <i>Province of Residence (Ontario)</i>         |                                  |         |         |                                |         |                 |
| Atlantic – NB, NL, NS, PEI                     |                                  |         | 1.12    |                                |         | 0.71            |
| Quebec                                         |                                  |         | 0.77**  |                                |         | 0.51***         |
| Prairies – MB, SK, AB                          |                                  |         | 1.01    |                                |         | 1.03            |
| British Columbia                               |                                  |         | 1.08    |                                |         | 1.20            |
| Territories – YT, NT, NU                       |                                  |         | 1.42    |                                |         | 1.76            |
| Constant                                       | 0.18***                          | 0.12*** | 0.06*** | 0.06***                        | 0.03*** | 0.02***         |

†  $p < 0.1$  \*  $p < 0.05$ . \*\*  $p < 0.01$ . \*\*\*  $p < 0.001$ .

Source: Canadian Community Health Survey 2015-2016

Notes: Controls in nested models are as follows:

A: age. B: age, household income. C: age, household income, education, partnership, race, and province of residence.

<sup>a</sup> N=15,316 because some observations were dropped due to missing partnership status.
